# Supplementary material for: Micro-cold-forming: a simple, rapid, and inexpensive method for the fabrication of microcavities for 3D cell culture
Source: Royal Society of Chemistry journal article supplement (doi:10.1039/d6ra02741e), 2026-05-15
Supplement: d6ra02741e1.pdf [file d6ra02741e1.pdf]

## Micro-cold-forming: A simple, rapid, and inexpensive method for the fabrication of microcavities for 3D cell culture

Jay Rabindra Kumar Samal,\* Pinak Samal, Carla Pou Casellas, Maarten B. Rookmaaker, Marianne Verhaar, Pamela Habibović, Stefan Giselbrecht and Roman Kurt Truckenmüller\*

### Supplementary information

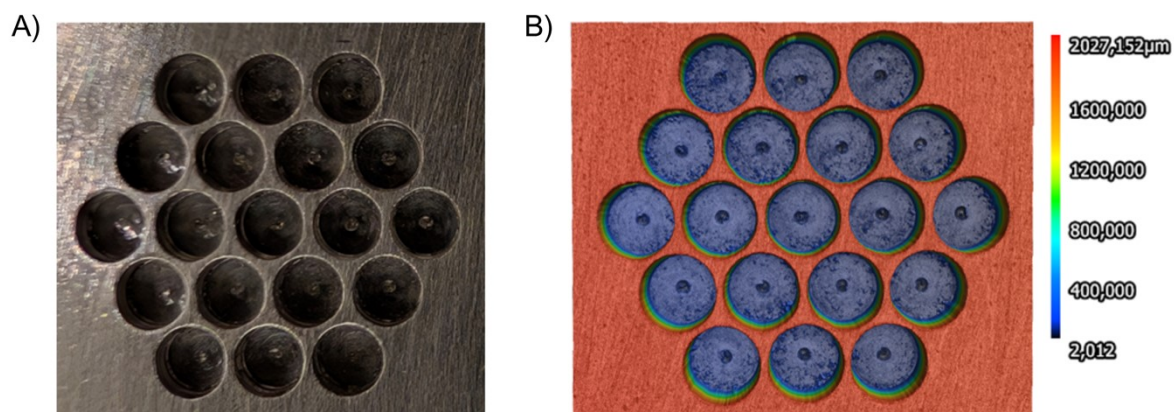

**Fig. S1:** (A) Photo and (B) optical profilometer-derived height-map of stainless-steel mold used for micro-cold-forming.

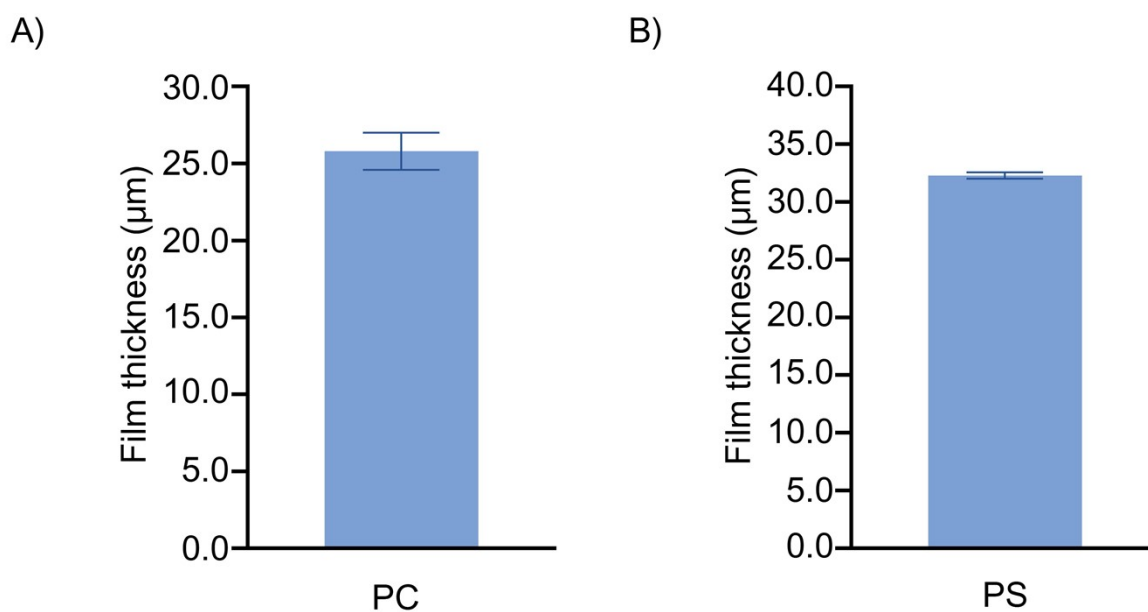

**Fig. S2:** Measurement of the thickness of the (A) PC and (B) PS film used in this study. Bars and error bars represent mean values  $\pm$  SD. N = 5.

**Table S1:** qPCR primers

| Gene           | Forward primer sequence 5'-3' | Reverse primer sequence 5'-3' |
|----------------|-------------------------------|-------------------------------|
| <i>GAPDH</i>   | GATTTGGTCGTATTGGGCGC          | TTCCCGTTCTCAGCCTTGAC          |
| <i>ANPEP</i>   | TGAGCTGTTTGACGCCATCT          | GCCCTGCTTGAATACGTCCT          |
| <i>ABCC4</i>   | CTCACGCTCATGGGGATGTT          | GGTGGTGGGCGTTTCTGATA          |
| <i>SLC4A4</i>  | TCTCCAGTGCAAGTAGGATGT         | GGTCCTTCTCCGGTTTATCAGA        |
| <i>CLDN10</i>  | CCTGGGCTTCTTTGGTTCCA          | TCATTGAGCACAGCCCTGAC          |
| <i>PCBD1</i>   | GGGTGGAATGAGCTGGAAGG          | AGCGTGATGTGGACCTTGTT          |
| <i>AQP3</i>    | CTGGATCAAGCTGCCATCT           | CATTGGGGCCCGAAACAAAA          |
| <i>NR3C2</i>   | TGTCCTGCTTGCAGACTTCAGA        | GCTGCTCCTCGTGAATCCCT          |
| <i>SLC41A3</i> | AGCCGAATCTCAACCTACCTG         | CATGGAATTGATTTCTGACGTGC       |
| <i>TRPM7</i>   | TCCATTTACACCTGTGCCTCC         | GCTCTTCGTAAACCTCCTCCC         |
| <i>HNF1B</i>   | ACCAAGCCGGTCTTCCATACT         | GGTGTGTCATAGTCGTCGCC          |
| <i>GATA3</i>   | GCCCTACTACGGAAACTCGG          | GGTGGATGGACGTCTTGAG           |
| <i>MECOM</i>   | TATCCACGAAGAACGGCAATATC       | CATGGAAACTTTTGGTGATCTGC       |

**Table S2:** Summary of analyzed genes and their associated nephron segments and functions

| Gene           | Associated nephron segments and functions                                                                       |
|----------------|-----------------------------------------------------------------------------------------------------------------|
| <i>ANPEP</i>   | Expressed in proximal tubules and involved in peptide metabolism                                                |
| <i>ABCC4</i>   | Expressed in proximal tubules and collecting ducts and involved in ion transport                                |
| <i>SLC4A4</i>  | Expressed in proximal tubules and involved in bicarbonate transport and pH regulation                           |
| <i>CLDN10</i>  | Expressed in thick ascending limb of Henle's loop and involved in tight junction formation and ion permeability |
| <i>PCBD1</i>   | Expressed in distal tubules and involved in transcriptional regulation                                          |
| <i>AQP3</i>    | Expressed in collecting ducts and involved in facilitating water and glycerol transport                         |
| <i>NR3C2</i>   | Expressed in distal tubules and collecting ducts and important for sodium and water balance                     |
| <i>SLC41A3</i> | Expressed in nephron segments and involved in magnesium transport                                               |
| <i>TRPM7</i>   | Expressed in distal tubules and involved in magnesium and calcium transport                                     |

|              |                                                                                                                   |
|--------------|-------------------------------------------------------------------------------------------------------------------|
| <i>HNFB</i>  | Expressed in renal progenitors and epithelial cells and involved in regulation of nephron segment differentiation |
| <i>GATA3</i> | Expressed in ureteric bud and collecting ducts, involved in branching morphogenesis                               |
| <i>MECOM</i> | Expressed in progenitor cells and renal mesenchyme and involved in kidney development                             |
